# 1 Diagnostic Value of Carotid Ring Sign in Predicting 2 Internal Carotid True Occlusion 3

4 Running Title: Carotid ring sign and true carotid occlusion

5 Tingyu Yi<sup>1</sup>, MD\*; Yi Sui<sup>2</sup>, MD\*<sup>.,#</sup>; Ding-huan Zheng<sup>3</sup>; MD; Xinwen Ren<sup>4</sup>, PhD;  
6 Xiao-hui Lin<sup>1</sup>, MD; Yan-min Wu<sup>1</sup>, MD; Ding-lai Lin<sup>1</sup>, MD; Zhi-nan Pan<sup>1</sup>, MD;  
7 Xiu-fen Zheng<sup>1</sup>, MD; Ganji Hong<sup>1</sup>, MD; Mei-hua Wu<sup>1</sup>, MD; MD; Lisan Zeng<sup>1</sup>, MD;  
8 Wen-huo Chen<sup>1</sup>, MD<sup>#</sup>

9 1. Zhangzhou Affiliated Hospital of Fujian Medical University, Fujian, China

10 2. Department of Neurology, Shenyang First People's Hospital, Shenyang Medical  
11 College, Shenyang, China

12 3. Department of Neurology, Huian County Hospital, Quanzhou, Fujian, China

13 4 The George Institute for Global Health China

14 \* Ting-yu Yi and Yi Sui contributed equally to this article

15 # Correspondence to: Dr. Wen-huo Chen, E-mail address: [doctorwwenhuo@126.com](mailto:doctorwwenhuo@126.com),

16 Department of Neurology, Zhangzhou affiliated Hospital of Fujian Medical

17 University, Fujian, China; Dr. Yi Sui, E-mail address: [jakeyisui@icloud.com](mailto:jakeyisui@icloud.com),

18 Department of Neurology, Shenyang First People's Hospital, Shenyang, China

19 Type: Original research

20 Word Count: 2434

21 Figure: 3

22 Table: 2

23 Key words: Acute ischemic stroke; tandem occlusion; carotid ring sign; True occlusion; Carotid artery;  
24 pseudo-occlusion;

25 Disclosures: All authors disclose that there were no potential interests.

26 Data Sharing Statement: No additional unpublished data are available

**NOTE: This preprint reports new research that has not been certified by peer review and should not be used to guide clinical practice.**

27 Publication History: NA

28 Sources of Funding: National Health Commission Capacity Building and Continuing

29 Education Center, grant number GWJJ2021100203, Natural Science Foundation of Fujian

30 Province (Grant No. 2022J01123138).

31

32

33

## 34 BACKGROUND AND PURPOSE

35 To differentiate between pseudo-occlusion (PO) and true occlusion (TO) of internal  
36 carotid artery (ICA) is important in thrombectomy treatment planning for acute  
37 ischemic stroke (AIS) patients. Although delayed contrast filling has been  
38 differentiated carotid PO from TO, its application has been limited by the  
39 implementations of multiphasic computed tomography angiography (mCTA). In this  
40 study, we hypothesized that carotid ring sign, which is readily acquired from  
41 single-phasic CTA, can sufficiently differentiate carotid TO from PO.

## 42 METHODS

43 Two hundred patients with non-visualization of the proximal ICA were included.  
44 Diagnosis of PO or TO of the cervical segment of ICA was made based on digital  
45 subtraction angiography. Diagnostic performances of carotid ring sign on  
46 arterial-phasic CTA and delayed contrast filling on mCTA were evaluated and  
47 compared.

## 48 RESULTS

49 One-hundred-twelve patients had ICA PO and 88 had TO. Carotid ring sign was more  
50 common in TO patients (70.5% vs 6.3%,  $p < 0.001$ ), while delayed contrast filling was  
51 more common in PO (94.9% vs 7.7%,  $p < 0.001$ ). The sensitivity and specificity of  
52 carotid ring sign in diagnosing carotid TO was 0.70 and 0.94 respectively, while  
53 sensitivity and specificity of delayed contrast filling was 0.95 and 0.92 in judging  
54 carotid PO.

## 55 CONCLUSIONS

56 Carotid ring sign is a potent imaging marker in diagnosing ICA TO. Carotid ring sign  
57 could be complementary to delayed contrast filling sign in differentiating TO from PO,  
58 in particular in centers with only single-phasic CTA.

59

## 60 **Introduction**

61 Identification and differentiation of true occlusion (TO) and pseudo-occlusion (PO) of  
62 internal carotid artery (ICA) are critical for endovascular management of acute  
63 ischemic stroke(AIS)<sup>12</sup>. Computed Tomography Angiography (CTA) has been  
64 suggested as a reliable tool in assessing thrombus length, clot burden, collaterals and  
65 decision making regarding endovascular therapies (EVT)<sup>3-7</sup>. Delayed contrast filling  
66 derived from multiphase CTA(mCTA) showed an adequate diagnostic value in  
67 differentiating PO from TO<sup>8</sup>. However, the small-scale study may need further  
68 verification as visual assessment of faint change of intraluminal contrast staining  
69 might be even missed by experienced neurologists<sup>9</sup>. More importantly, multiphase  
70 CTA is not routinely available in many stroke centers. In this study, we hypothesized  
71 carotid ring sign derived on single-phasic CTA (sCTA) is a potent imaging marker to  
72 differentiate carotid TO from PO.

## 73 **Methods**

### 74 *Patient population and clinical data collection*

75 The study is based on a prospective, hospital-based registry of consecutive large  
76 vessel occlusion (LVO) patients treated with endovascular therapies (EVT).  
77 Information about patient characteristics, medical and endovascular interventions,  
78 periprocedural management and clinical prognosis were routinely collected through an  
79 electronic database after patients were admitted to the hospital.

### 80 *Definition of TO, PO, carotid ring sign and delayed contrast filling*

81 Digital subtraction angiography (DSA) was used as a reference standard imaging for  
82 diagnosis of TO or PO of the proximal cervical ICA. Proximal C1 ICA occlusion on  
83 DSA was defined as an actually angiographical occlusion which impedes the passage  
84 of contrast to distal C1 segment and the advance of guidewire or catheter<sup>1</sup>, which was  
85 also named as ICA TO. Proximal C1 ICA occlusion on CTA was defined as complete  
86 nonattenuation of proximal segment of cervical ICA on arterial phase CTA. ICA PO  
87 was defined as the demonstration of occlusion on CTA while revealed patent on DSA  
88 of proximal C1 ICA. We defined the CTA carotid ring sign as a ring-like  
89 appearance > 50% circumference of the vessel wall at the levels of ICA C1 maximum  
90 stenosis on axial maximum intensity projection images<sup>10</sup>. The CTA carotid ring sign  
91 may be contrast-enhanced or -nonenhanced. We defined the phenomenon of delayed  
92 contrast filling as a delayed demonstration of arterial contrast at distal ICA C1  
93 segment during the second or third phase instead of the first phase of mCTA<sup>8</sup>.

94 *Inclusion and exclusion criteria*

95 Patients were eligible for the study if they met all following criteria: 1) AIS due to  
96 LVO in the anterior circulation, 2) demonstration of C1 occlusion on arterial phase  
97 CTA, 3) underwent endovascular therapy in acute phase. Patients were excluded from  
98 the study if 1) the CTA imaging did not have adequate quality for analysis, 2) the  
99 demonstration of C1 occlusion was not the culprit vessel.

100 *CTA protocol and imaging acquisition:*

101 Two computed tomography (CT) machines were used for the study. For Siemens  
102 Force scanner, the CTA parameters were: slice thickness 0.75 mm, increment 0.5 mm,  
103 tube voltage 80 kV (ref mAs: 129mAs~72mAs), reconstruction field of view 200 mm.  
104 For GE Revolution scanner, the CTA parameters were: slice thickness 0.625 mm,  
105 increment 0.625 mm, tube voltage 80~120 kV, reconstruction field of view 250 mm.  
106 For both scanners, automatic bolus tracking technique were applied after the  
107 intravenous injection of the contrast (100Hu, flow rate 4.5~6ml/s, contrast volume:  
108 45~60ml, NaCl volume: 45~60ml). For the arterial phase, a contrast agent  
109 tracking-triggered approach was utilized. The monitoring site was the ascending aorta  
110 at the aortic arch level. After contrast agent injection, there was an 8-second delay  
111 before monitoring commenced. Monitoring occurred every 1.5 seconds, with a trigger  
112 threshold set at 100 HU (normally 1-3 circles). Once triggered, there was an additional  
113 3-second delay before initiating a cranial-directed arterial phase scan. The scanning  
114 range spanned from the tracheal bifurcation to the apex of the skull, with an  
115 approximate scanning time of 3 seconds. For the venous phase, there was a  
116 5.5-second delay, with the scanning range extending from the bifurcation of the  
117 common carotid artery to the skull apex. For the delay phase, there was a 7-second  
118 delay, and the scanning covered from the C1 vertebra to the skull apex.

119 *Statistical analysis*

120 Quantitative variables were expressed as the mean and SD or median and interquartile  
121 range (IQR), and categorical variables were expressed as N number and frequencies  
122 (%). The Student t test, Pearson  $\chi^2$  test, and Cochran Mantel Haenszel  $\chi^2$  were used  
123 to compare the differences between the true and pseudo-occlusion groups. Variables  
124 with p values < 0.1 from univariate analysis were adjusted in multivariate analysis  
125 model for outcome assessment.

126 To assess the diagnostic capacity of distinct imaging features for the differentiation  
127 between true from pseudo-occlusion, the area under the receiver operating

128 characteristics (ROC) curves were calculated. DeLong approach was used to compare  
129 the area under the curves between carotid ring sign, calcification at occlusion sites,  
130 and delayed contrast filling. All statistical inferences were two-sided and  $p < .05$  was  
131 defined as significant. SPSS (version 15.0; SPSS Inc., Chicago, IL, USA) were used  
132 for all statistical calculations.

## 133 **Results**

### 134 *Patient characteristics*

135 Patients were retrospectively screened and selected through a prospectively designed  
136 hospital-based electronic database (Nalong 2.0, Xiamen, Fujian, China). From June  
137 2018 to February 2022, electrical medical records of 1420 patients with acute LVO in  
138 the anterior circulation underwent emergent EVT were consecutively screened (fig 2).  
139 Three hundred seventy patients were found to have ICA occlusion on admission CTA,  
140 while 211 patients with C1 segment occlusion were included and 159 patients with  
141 C2-C7 occlusion were excluded. After exclusion of 7 patients with poor imaging  
142 quality and 4 patients with inconclusive neurointerventional procedures. Finally, there  
143 were 200 patients in total included in final analysis, among which 69 patients were  
144 analyzed for delayed contrast filling using mCTA. Images of single-phase CTA or  
145 arterial phase of mCTA from all 200 patients were analyzed for carotid ring sign and  
146 calcification at occlusion sites (Fig 1). There were TO in 88 patients and PO in 112  
147 patients.

### 148 *Baseline comparison between TO and PO patients*

149 The main characteristics of patients are summarized in Table 1. Patients with TO were  
150 more of male sex compared with PO (77.8 % vs 55.5 %,  $p = 0.001$ ). In line with the  
151 finding of more hyperlipidemia in TO patients (26.1% vs 8.9%,  $p < 0.001$ ), atrial  
152 fibrillation rate was higher in PO patients (57.1 % vs 8.0 %,  $p < 0.001$ ), etiology of  
153 large artery atherosclerosis (LAA) was more frequent in TO patients (92.0 % vs  
154 24.1 %,  $p < 0.001$ ) and cardio-embolism rate was more frequent in PO group (67.9 %  
155 vs 2.3 %,  $p < 0.001$ ). Not surprisingly, compared with TO patients, carotid stenting  
156 was more frequently deployed in TO patients (92.0% vs 0 %,  $p < 0.001$ ).

157 Three imaging markers showed diagnostic potentials for differentiating PO from TO  
158 of ICA C1 segment. Both the presence of carotid ring sign and calcification at the  
159 occlusion site were significantly higher in TO compared with PO patients (70.5 % vs  
160 6.3 %,  $p < 0.001$ ; 75.0 % vs 36.6 %,  $p < 0.001$ ). In PO group (n=112), there were only  
161 7 cases with carotid ring sign, i.e., 85.75% (6/7) with hypertension, 85.75% (6/7) with

162 atrial fibrillation, 42.9% (3/7) with diabetes mellitus. Compared with cases without  
163 carotid ring sign (n=105), patients with carotid ring sign (n=7) was elder (84 vs 70,  $p$   
164  $< 0.001$ ) and less male sex (0% vs 57.1%,  $p=0.011$ ).

165 Totally 69 patients underwent mCTA, and the presence of delayed contrast filling was  
166 significantly frequent in PO patients (94.9 % vs 7.7 %,  $p < 0.001$ ). In TO groups  
167 (n=88), there were only 2 cases with delayed contrast filling, of which occlusion site  
168 located at the middle segment of C1, and very little contrast through C1 on DSA in  
169 one case.

#### 170 ***Inter-observer agreement***

171 All imaging features assessed in the study were independently reviewed by 2  
172 experienced neurointerventionists (DH.Z. and ZN.P.) who were blind to results of the  
173 interventional angiography. Cases with disagreement were reviewed again and the  
174 dispute were resolved by consensus. Cohen kappa coefficient was used to measure  
175 inter-observer agreement of various imaging markers. Excellent agreement was  
176 achieved ( $kappa = 0.90$ ) for both carotid ring sign and delayed contrast filling sign.

#### 177 ***Comparison of diagnostic performance between CTA carotid ring sign and delayed*** 178 ***contrast filling***

179 Table 2 summarizes the differential diagnostic values of carotid ring sign for TO and  
180 delayed contrast filling for PO. The carotid ring sign has a AUC of 0.86 (SE  $\pm$  0.05),  
181 sensitivity of 0.70 (95% CI, 0.60-0.79), specificity of 0.94 (95% CI, 0.87-0.97), PPV  
182 of 0.90 (95% CI, 0.80-0.95) and NPV of 0.80 (95% CI, 0.72-0.86). The delayed  
183 contrast filling sign has an AUC of 0.94 (SE  $\pm$  0.04), sensitivity of 0.95 (95% CI,  
184 0.92-0.99), specificity of 0.92 (95% CI, 0.73-0.99), PPV of 0.95 (95% CI, 0.81-0.99)  
185 and NPV of 0.92 (95% CI, 0.73-0.99). Representative images of carotid ring sign  
186 suggesting TO at C1 segment and delayed contrast filling suggesting PO were  
187 presented in Figure 2 and 3 respectively.

188

189 **Discussion**

190 The main finding of the study is that the presence of carotid ring sign from  
191 single-phase CTA or arterial phasic mCTA is a reliable marker to identify TO at ICA  
192 C1 segment. In addition, we confirmed the delayed contrast filling sign is a valuable  
193 marker to identify PO at the same site.

194 Carotid sign was defined as ring-like enhancement in carotid wall and/or intraluminal  
195 hypodensity on axial CTA sections. Firstly presented by Patrik Michel et al. that  
196 presence of carotid ring sign can differentiate acute symptomatic carotid occlusion  
197 from chronic asymptomatic occlusion<sup>10</sup>, they also proposed a pathophysiological  
198 explanation that the occurrence of the ring sign may be due to the contrast  
199 enhancement of the vasa vasorum in the viable arterial wall, and the luminal  
200 hypodensity corresponding to the absence of contrast uptake by the inherently  
201 vascular occluding thrombus<sup>10</sup>. The proposed pathophysiology helps to explain the  
202 high PPV of carotid ring sign in predicting carotid TO in this study. The main  
203 functions of the vasa vasorum are to deliver nutrients to the vessel wall and to remove  
204 waste products or noxious substances<sup>11</sup>. Adventitial vasa vasorum involves in the  
205 process of atherogenesis and atherosclerotic plaque progression<sup>11</sup>, and vasa vasorum  
206 enhancement recognized on CTA was strongly associated with symptomatic patients  
207 with carotid artery stenosis<sup>12</sup>.

208 Previous studies showed that 60%-70% causes of TO was atherosclerotic stenosis,  
209 20%-30% was dissection and the remainder was carotid webs and cardiac emboli<sup>13,14</sup>.  
210 Our study showed 92% of cause of TO was atherosclerotic stenosis, 6% was  
211 dissection, 2% was cardioembolic. The difference could result from study samples  
212 and ethnics. Meanwhile, our study showed three quarters of TO had carotid ring sign,  
213 while very few (6% ,7 cases) of PO showed carotid ring sign. These 7 cases shared  
214 common atherosclerotic characteristics such as older age, hypertension and diabetes.  
215 Since most of these patients (87.5%, 6/7) also exhibited arterial fibrillation, we  
216 suggest TO should be considered with caution in elder patients with arterial  
217 fibrillation.

218 Delayed contrast filling on mCTA was reported to be a potent image marker in the  
219 identification of carotid occlusion site. As a contrast, single-phase CTA showed  
220 limited diagnostic value for the differentiation even for specialized radiologists<sup>1</sup>.  
221 Wareham, J. et al. first proposed to use multiphasic CTA to differentiated PO from  
222 TO, although the study failed to test the hypothesis<sup>15</sup>, but the study conducted by Choi,



223 J.H. et al. did<sup>8</sup>. Delay time is one of the issues to account for the discrepancy. More  
224 than 40-second delay was employed in the former study, while there was only less  
225 than a 15-second delay in the latter. Extended delay time may cause the contrast to be  
226 washed out from target artery and failed to be detected by mCTA. Optimal CTA  
227 parameters to reveal hemodynamic abnormality for ICA pseudo-occlusion depend on  
228 different CT scanners. Consistent with the previous study, delayed contrast filling had  
229 high sensitivity and specificity and accuracy in differentiating PO from TO<sup>8</sup>. Of note,  
230 false positives of delayed contrast filling presented in TO patients may be due to, a)  
231 initial C1 high degree/near-occlusion stenosis; b) the culprit segment was located at or  
232 beyond middle segment of C1.

233 Carotid ring sign and delayed contrast filling each has its advantages and  
234 disadvantages. Carotid ring sign can be readily obtained from arterial phasic CTA  
235 without considering delay time, but its visual evaluation depends on raters' experience  
236 and appropriate window level and window width. In comparison, although delay  
237 contrast filling from mCTA can easily spot ICA PO with a high sensitivity, the  
238 imaging quality may be affected by cardiac function, venous vasculature, motion  
239 artifacts and delay time.

240 Our study has limitations. First, the retrospective nature of this study may introduce  
241 uncontrolled bias. Second, all of the 200 patients with single-phase/arterial phasic  
242 CTA were included for the analysis of carotid ring sign, while only 69 patients with  
243 mCTA were analyzed for delayed contrast filling. The two datasets may be subject to  
244 uncontrolled/unadjusted variables. Third, since the carotid ring sign is visually  
245 identified in the study, it will be inevitably subject to the configuration of CT scanners,  
246 imaging acquisition process and inter-observer variance. Future studies are warranted  
247 to verify the generalizability of the findings.

248 In conclusion, we demonstrated that the carotid ring sign on sCTA is a reliable  
249 imaging marker to diagnose TO at proximal C1 ICA, and also confirmed the  
250 diagnostic value of delayed contrast filling sign on mCTA in diagnosing ICA PO.

251

## 252 **References**

- 253 1. Diouf A, Fahed R, Guilbert F, Landry D, Raymond J, Roy D. cervical internal  
254 carotid Occlusion versus Pseudo- occlusion at cT angiography in the context of  
255 acute stroke: An Accuracy, Interobserver, and Intraobserver Agreement Study.  
256 *Radiology*. 2018;000:1–8.
- 257 2. Grossberg JA, Haussen DC, Cardoso FB, Rebello LC, Bouslama M, Anderson  
258 AM, et al. Cervical Carotid Pseudo-Occlusions and False Dissections:  
259 Intracranial Occlusions Masquerading as Extracranial Occlusions. *Stroke*.  
260 2017;48:774–777.
- 261 3. Menon BK, D’Esterre CD, Qazi EM, Almekhlafi M, Hahn L, Demchuk AM, et  
262 al. Multiphase CT angiography: A new tool for the imaging triage of patients  
263 with acute ischemic stroke. *Radiology*. 2015;275:510–520.
- 264 4. Yan S, Chen Q, Xu M, Sun J, Liebeskind DS, Lou M. Thrombus Length  
265 Estimation on Delayed Gadolinium-Enhanced T1. *Stroke*. 2016;47:756–761.
- 266 5. Mortimer AM, Little DH, Minhas KS, Walton ERJ, Renowden SA, Bradley  
267 MD. Thrombus length estimation in acute ischemic stroke: A potential role for  
268 delayed contrast enhanced CT. *J. Neurointerv. Surg*. 2014;6:244–248.
- 269 6. Heo JH, Kim K, Yoo J, Kim YD, Nam HS, Kim EY. Computed  
270 tomography-based thrombus imaging for the prediction of recanalization after  
271 reperfusion therapy in stroke. *J. Stroke*. 2017;19:40–49.
- 272 7. Dundamadappa S, Iyer K, Agrawal A, Choi DJ. Multiphase ct angiography: A  
273 useful technique in acute stroke imaging-collaterals and beyond. *Am. J.*  
274 *Neuroradiol*. 2021;42:221–227.
- 275 8. Choi JH, Jang J, Koo J, Ahn KJ, Sam Shin Y, Kim BS. Multiphasic Computed  
276 Tomography Angiography Findings for Identifying Pseudo-Occlusion of the  
277 Internal Carotid Artery. *Stroke*. 2020;51:2558–2562. Available from:
- 278 9. Mayank Goyal, Johanna M Ospel. Letter by Goyal and Ospel Regarding Article,  
279 "Multiphasic Computed Tomography Angiography Findings for Identifying  
280 Pseudo-Occlusion of the Internal Carotid Artery". *Stroke*, 2020 ,  
281 51(11):e335-e336.
- 282 10. Michel P, Ntaios G, Delgado MG, Bezerra DC, Meuli R, Binaghi S. CT  
283 angiography helps to differentiate acute from chronic carotid occlusion: The  
284 “carotid ring sign.” *Neuroradiology*. 2012;54:139–146.
- 285 11. Sun Z. Atherosclerosis and atheroma plaque rupture: Imaging modalities in the  
286 visualization of vasa vasorum and atherosclerotic plaques. *Sci. World J.*  
287 2014;2014.
- 288 12. Romero JM, Pizzolato R, Atkinson W, Meader A, Jaimes C, Lamuraglia G, et  
289 al. Vasa vasorum enhancement on computerized tomographic angiography  
290 correlates with symptomatic patients with 50% to 70% carotid artery stenosis.  
291 *Stroke*. 2013;44:3344–3349.

- 292 13. Gory B, Piotin M, Haussen DC, Steglich-Arnholm H, Holtmannspötter M,  
293 Labreuche J, et al. Thrombectomy in acute stroke with tandem occlusions from  
294 dissection versus atherosclerotic cause. *Stroke*. 2017;48:3145–3148.
- 295 14. Poppe AY, Jacquin G, Roy D, Stapf C, Derex L. Tandem carotid lesions in  
296 acute ischemic stroke: Mechanisms, therapeutic challenges, and future  
297 directions. *Am. J. Neuroradiol*. 2020;41:1–8.
- 298 15. Wareham J, Crossley R, Barr S, Mortimer A. Cervical ICA pseudo-occlusion  
299 on single phase CTA in patients with acute terminal ICA occlusion: What is the  
300 mechanism and can delayed CTA aid diagnosis? *J. Neurointerv. Surg*.  
301 2018;10:983–987.
- 302

303 *Table 1. Demographics and characteristics of included patients stratified by pseudo-*  
304 *and true occlusion.*

|                                 | All (n = 200) | PO (n = 112) | TO (n = 88) | P value |
|---------------------------------|---------------|--------------|-------------|---------|
| Age                             | 71 ± 11       | 71 ± 11      | 71 ± 10     | 0.945   |
| Sex (male)                      | 129 (64.5%)   | 60 (53.6%)   | 69 (78.4%)  | < 0.001 |
| Hypertension                    | 146 (73.0%)   | 83 (74.1%)   | 63 (71.6%)  | 0.691   |
| Diabetes                        | 56 (28.0%)    | 28 (25.0%)   | 28 (31.8%)  | 0.286   |
| Hyperlipidemia                  | 33 (16.5%)    | 10 (8.9%)    | 23 (26.1%)  | 0.001   |
| Atrial fibrillation             | 71 (35.5%)    | 64 (57.1%)   | 7(8.0%)     | < 0.001 |
| Smoking                         | 54 (27.1%)    | 26 (23.8%)   | 28 (31.8%)  | 0.174   |
| TOAST classification            |               |              |             |         |
| LAA                             | 108 (54.0%)   | 27 (24.1%)   | 81 (92.0%)  | < 0.001 |
| Cardioembolic                   | 78 (39.0%)    | 76 (67.9%)   | 2 (2.3%)    | < 0.001 |
| Other defined                   | 14 (7.0%)     | 9 (8.0%)     | 5 (5.7%)    | 0.517   |
| ASPECTS (IQR)                   | 8 (6-10)      | 7 (5-10)     | 9 (7-10)    | 0.071   |
| Recanalization eTICI 2b-3       | 193 (96.5%)   | 107 (95.5%)  | 86 (97.7%)  | 0.403   |
| Carotid stenting                | 81 (40.5%)    | 0 (0.0%)     | 81 (92.0%)  | < 0.001 |
| Carotid ring sign               | 69 (34.5%)    | 7 (6.3%)     | 62 (70.5%)  | < 0.001 |
| Calcification at occlusion site | 107 (53.5%)   | 41 (36.6%)   | 66 (75.0%)  | < 0.001 |
| Delayed contrast filling*       | 39(60.0%)     | 37 (94.9%)   | 2 (7.7%)    | < 0.001 |

305 TOAST, Trial of Org 10172 in Acute Stroke Treatment Large artery atherosclerosis; LAA large-artery  
306 atherosclerosis; IQR, interquartile range; ASPECTS, Alberta Stroke Program Early CT score; eTICI extended  
307 Thrombolysis in Cerebral Infarction. \* 69 patients with mCTA.

308

309

310

**Table 2.** Comparison of diagnostic value of distinct CTA vessel features

|                           | AUC ( $\pm$ SE)    | Sensitivity<br>(95% CI) | Specificity<br>(95% CI) | p value (95% CI)  | PPV (95% CI)    | NPV (95% CI)        | LR+ (95% CI)          | LR- (95% CI)        |
|---------------------------|--------------------|-------------------------|-------------------------|-------------------|-----------------|---------------------|-----------------------|---------------------|
| TO-Carotid ring sign      | 0.86 ( $\pm$ 0.05) | 0.70 (0.60-0.79)        | 0.94 (0.87-0.97)        | 0.003 (0.59-0.85) | 0.90(0.80-0.95) | 0.80<br>(0.72-0.86) | 11.21<br>(5.4-23.1)   | 0.31<br>(0.22-0.44) |
| PO-Delay contrast filling | 0.94 ( $\pm$ 0.04) | 0.95<br>(0.92-0.99)     | 0.92 (0.73-0.99)        | 0.000 (0.86-1.00) | 0.95(0.81-0.99) | 0.92(0.73-0.99)     | 12.33<br>(3.25-46.80) | 0.06<br>(0.01-0.22) |

AUC indicate area under the curve; SE, standard error; CI, confidence region; PPV, positive predictive value; NPV, negative predictive value; LR, likelihood Ratios

## Figure legends

Figure 1 Flowchart of patient selection.

Figure 2. A representative case showing a patient with true occlusion at left ICA C1 segment with positive carotid ring sign and negative delayed contrast filling. A positive carotid ring sign was detected on axial maximum intensity projection image (arrow heads, A). Compared with the 1<sup>st</sup> phase in mCTA (B), there was no delayed contrast filling revealed in 2<sup>nd</sup> phase (C). The true left C1 occlusion demonstrated an identical platform-like stump in both CTA phases (C and D), which was confirmed by DSA and endovascular maneuver (D).

Figure 3. A representative case showing a patient of pseudo-occlusion at left ICA C1 segment with negative carotid ring sign but positive delayed contrast filling. Neither carotid ring sign nor contrast filling was detected on axial maximum intensity projection image in the 1<sup>st</sup> phase of mCTA (arrow head, A), while delayed contrast filling was revealed in the 2<sup>nd</sup> phase at left proximal C1 segment (arrow head, inset image in A). Sagittal images showed an apparent delayed ascending of contrast filling from proximal (1<sup>st</sup> phase) to distal (2<sup>nd</sup> phase) ICA C1 segment (B). DSA image shows a patent ICA at C3 segment and beyond (C). Successful recanalization with a modified Thrombolysis in Cerebral Infarction (eTICI) score of 2c was achieved after mechanical removal of thrombus at C5 segment (D).



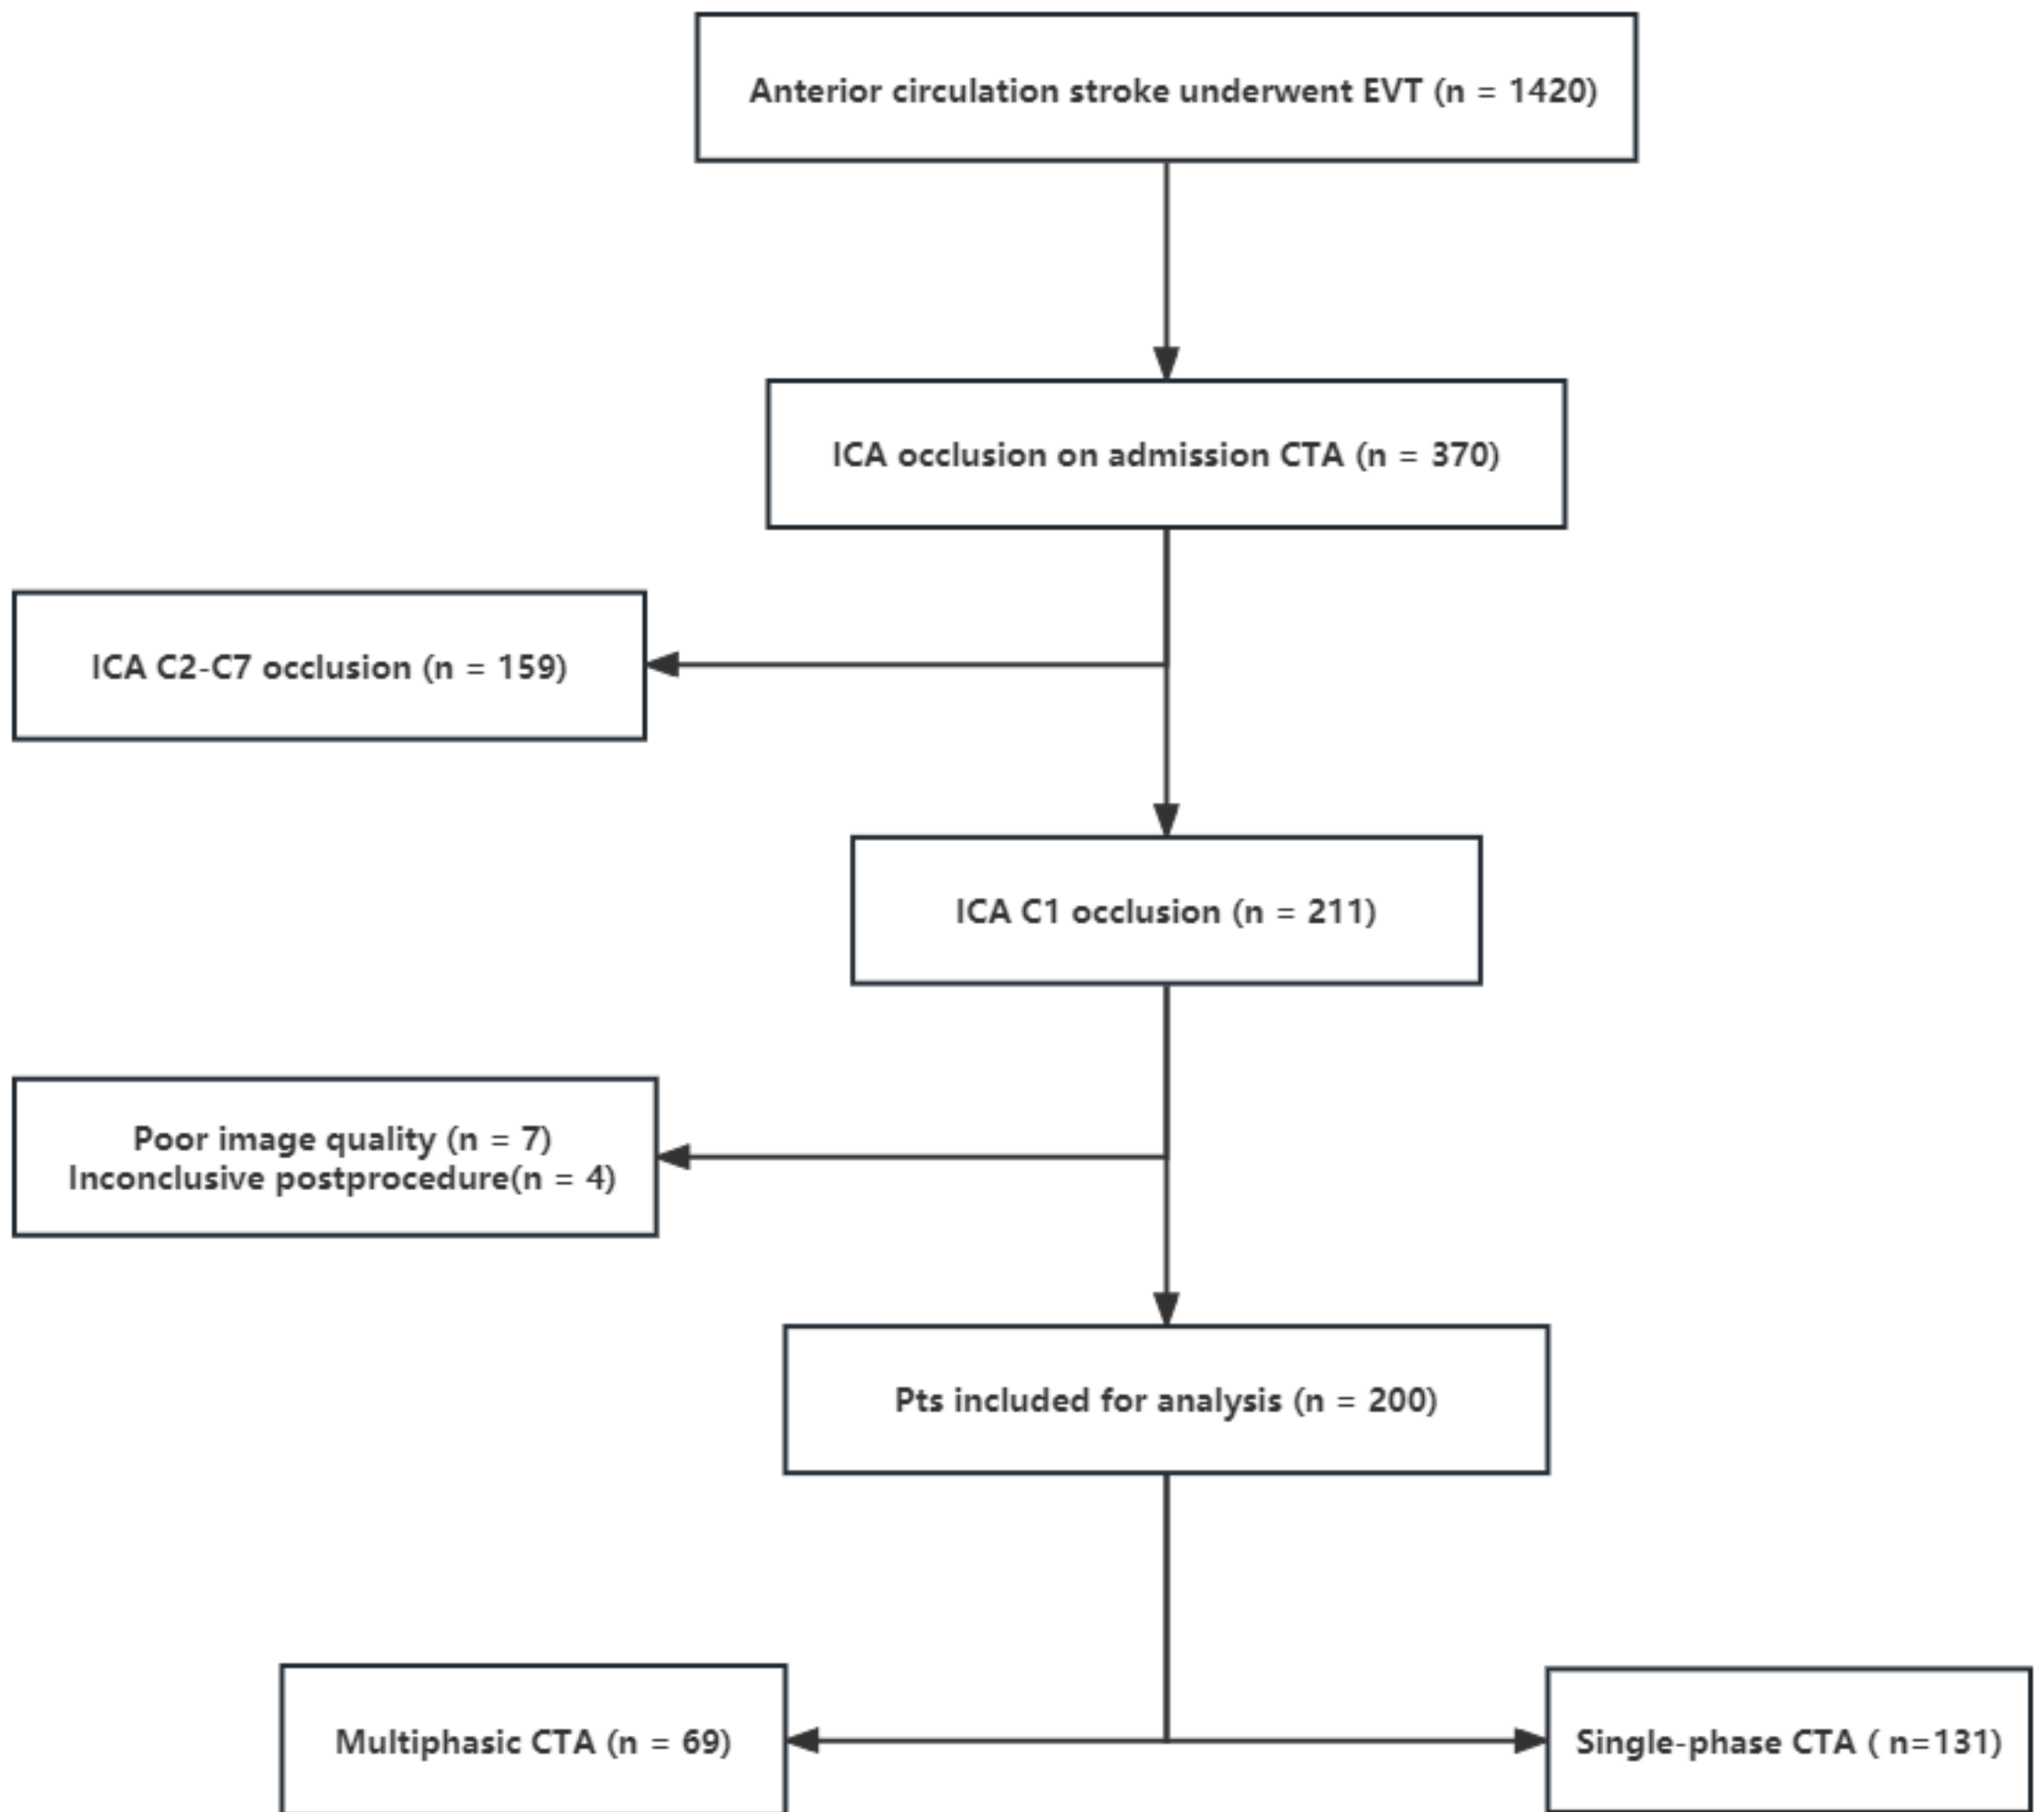

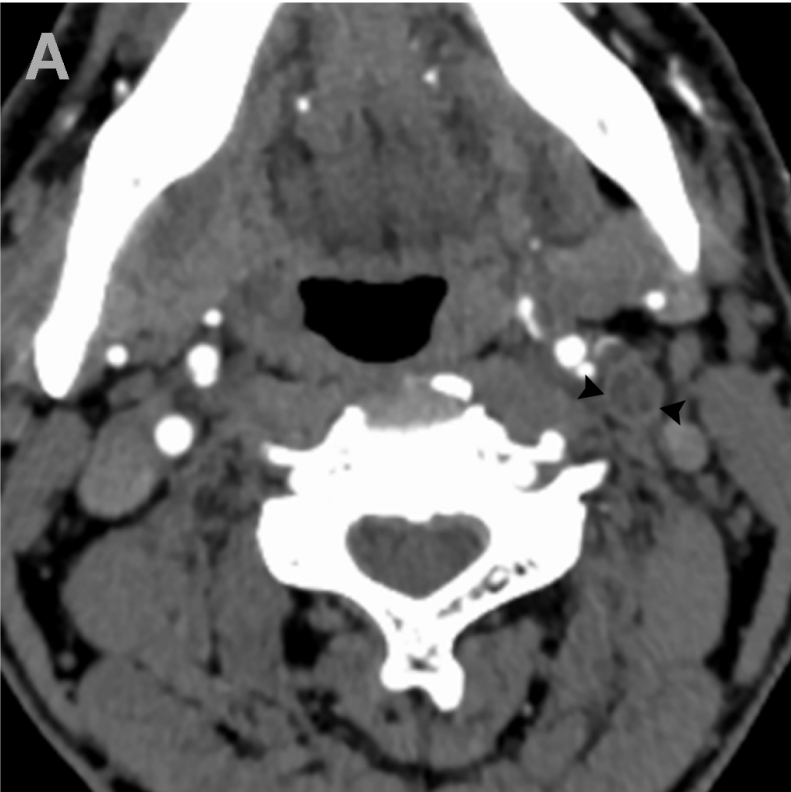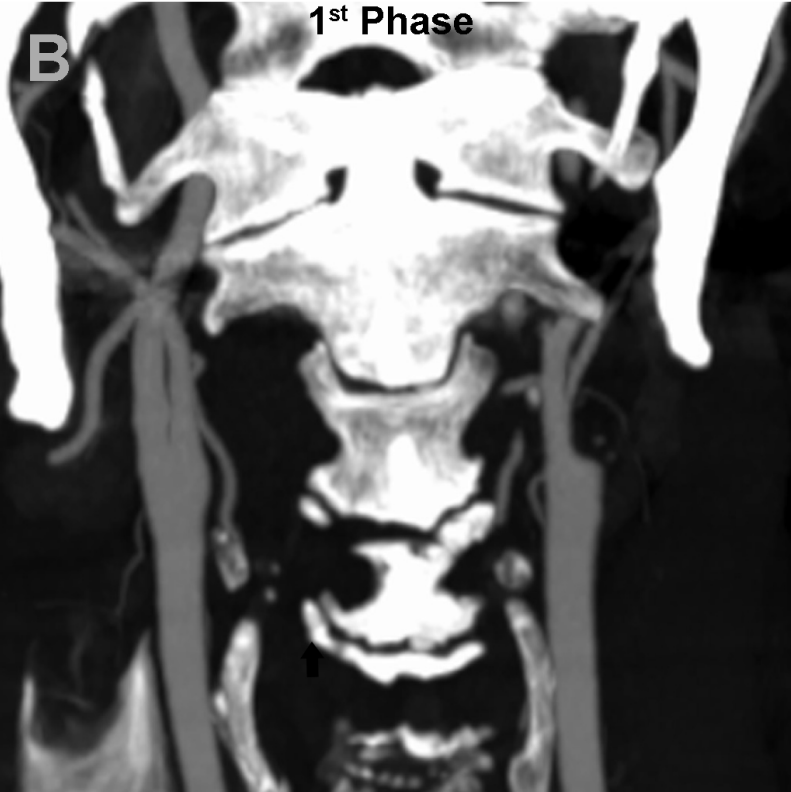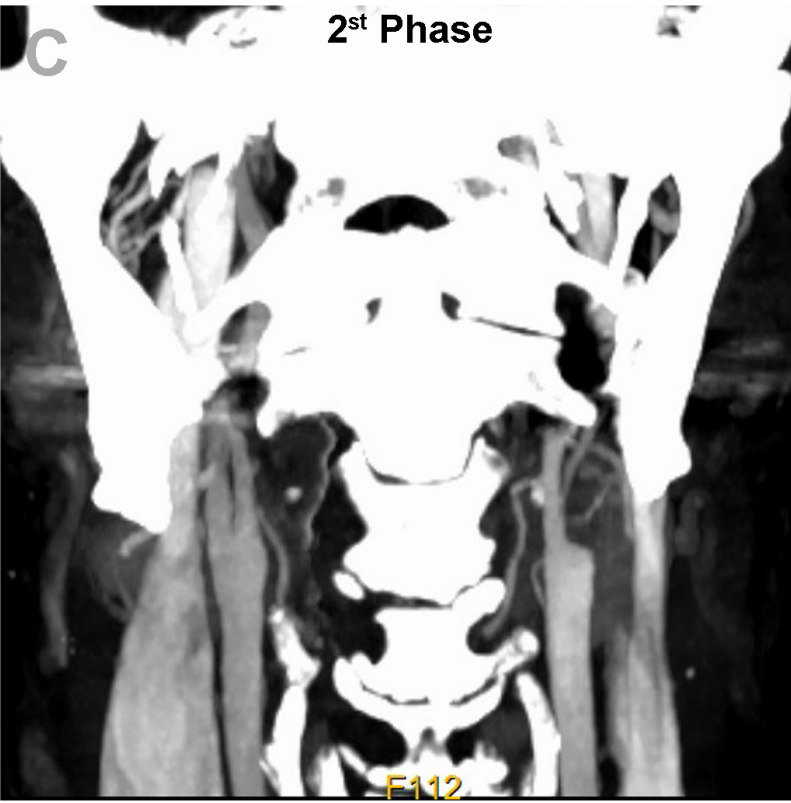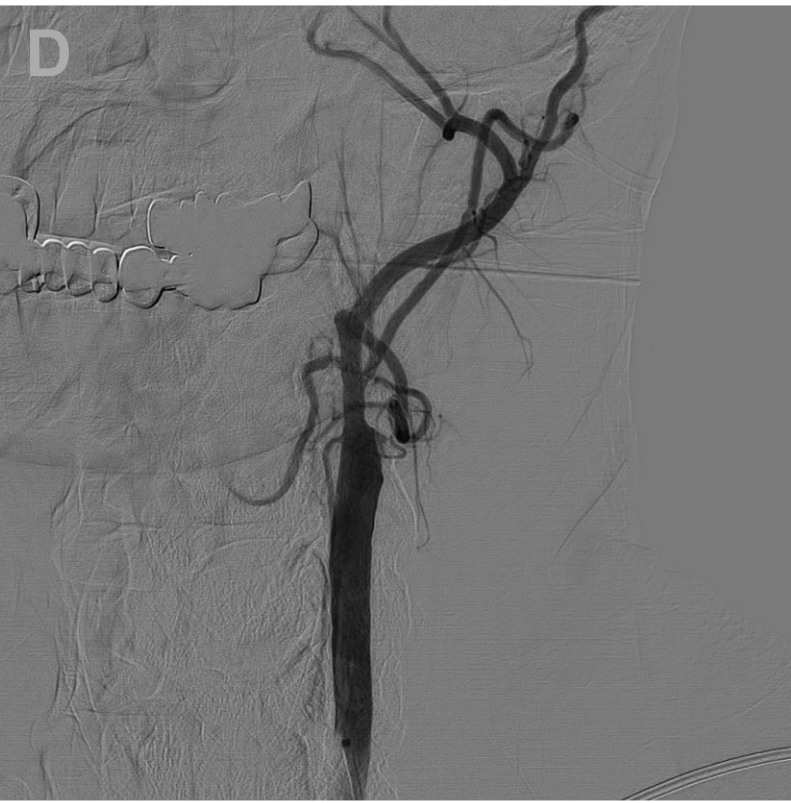

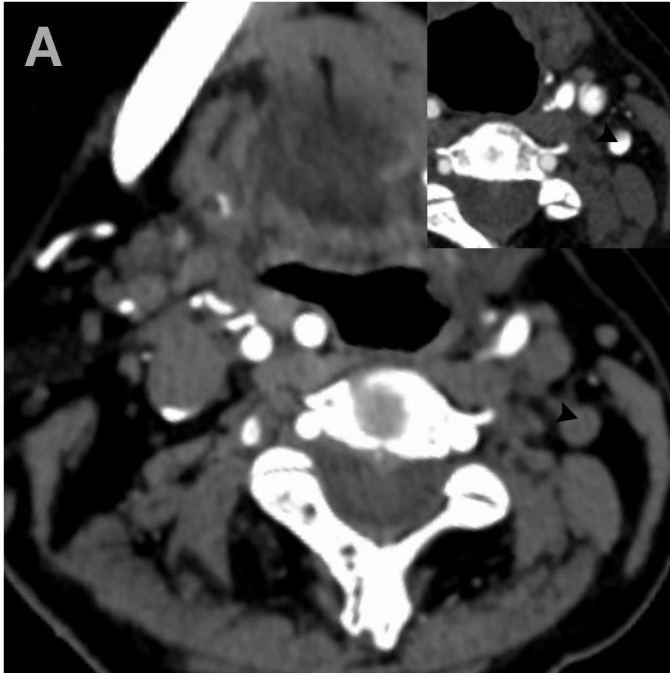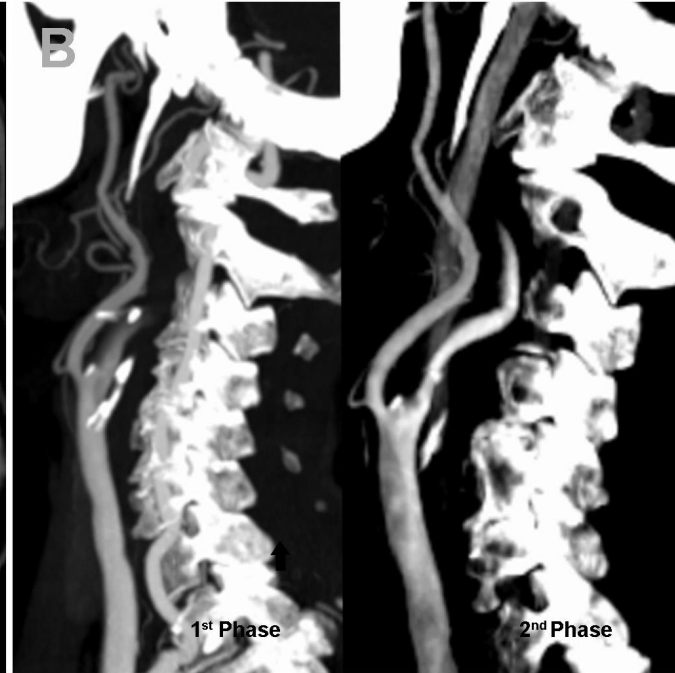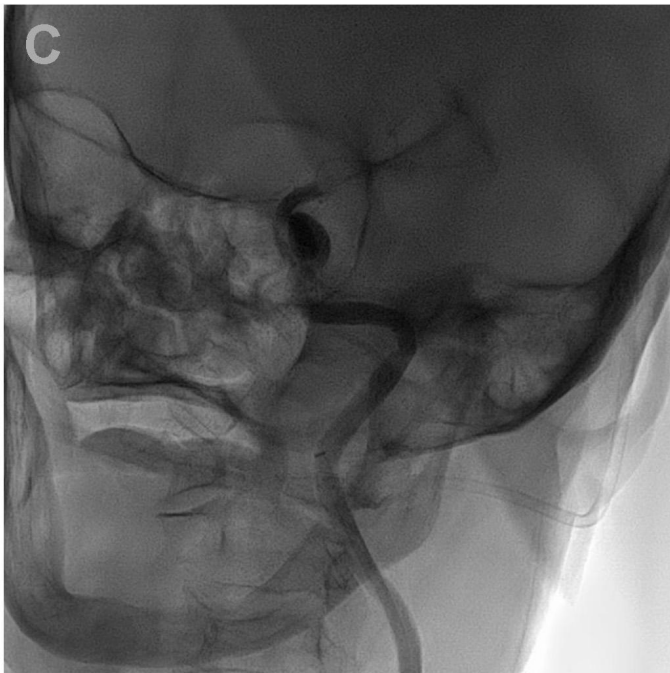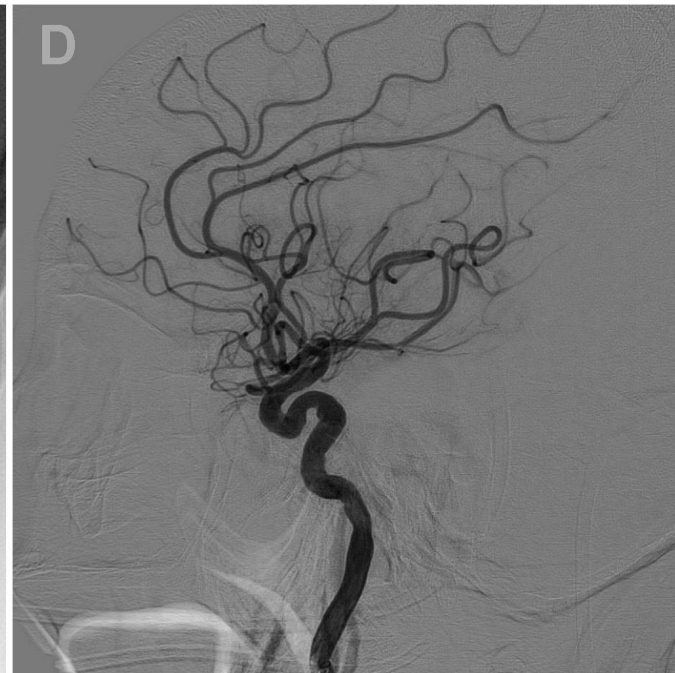

Source: https://medrxiv.org/content/10.1101/2023.09.13.23295519v1.full.pdf
